# Supplementary material for: Unreported mass movements and future hazard in the Warwan basin, Jammu and Kashmir, Western Himalaya
Source: Copernicus journal article supplement (doi:10.5194/egusphere-2025-6281), 2026-01-04
Supplement: Supplementary file 1 [file egusphere-2025-6281-supplement.pdf]

## Supplementary Material

### Unreported mass movements and future hazard in the Warwan basin, Jammu and Kashmir, Western Himalaya

Ashim Sattar\*, Shashi Kant Rai, A. Abhinav, Adam Emmer\*, Sunil Dhar, Umesh Haritashya, Mohd. Farooq Azam

Corresponding authors: Ashim Sattar and Adam Emmer

Email: [ashim.sattar@gmail.com](mailto:ashim.sattar@gmail.com)

[adam.emmer@natur.cuni.cz](mailto:adam.emmer@natur.cuni.cz)

**Table S1:** Remotely sensed data used in the present study

|                | Product                        | Spatial resolution                                                        | Temporal coverage      | Purpose                                                              |
|----------------|--------------------------------|---------------------------------------------------------------------------|------------------------|----------------------------------------------------------------------|
| Satellite Data | Landsat 7 ETM+                 | 15 m (Band 8 PAN)<br>30 m (Bands 1 to 5, and 7)<br>60 m (Band 6)          | 1999-2012              | Glacier and lake mapping                                             |
|                | Landsat 8 OLI                  | 15 m (Band 8 PAN)<br>30 m (Bands 1 to 7, and 9)<br>100 m (Band 10 and 11) | 2013-2015              | Glacier and lake mapping                                             |
|                | PlanetScope image              | 3 m                                                                       | 2016-2024              | Mapping crevasses, ice calving, avalanche release areas, and runouts |
|                | Google Earth collection        | < 0.5 m                                                                   | 2018-2024              | Glacier and lake mapping                                             |
|                | ALOS PALSAR DEM                | 12.5 m                                                                    | Acquisition date: 2011 | Terrain                                                              |
| Auxiliary data | Land Use and Land Cover (ESRI) | 10m                                                                       | 2023                   | Manning's N                                                          |
|                | Open Building                  | NA                                                                        | 2023                   | GLOF exposure.                                                       |

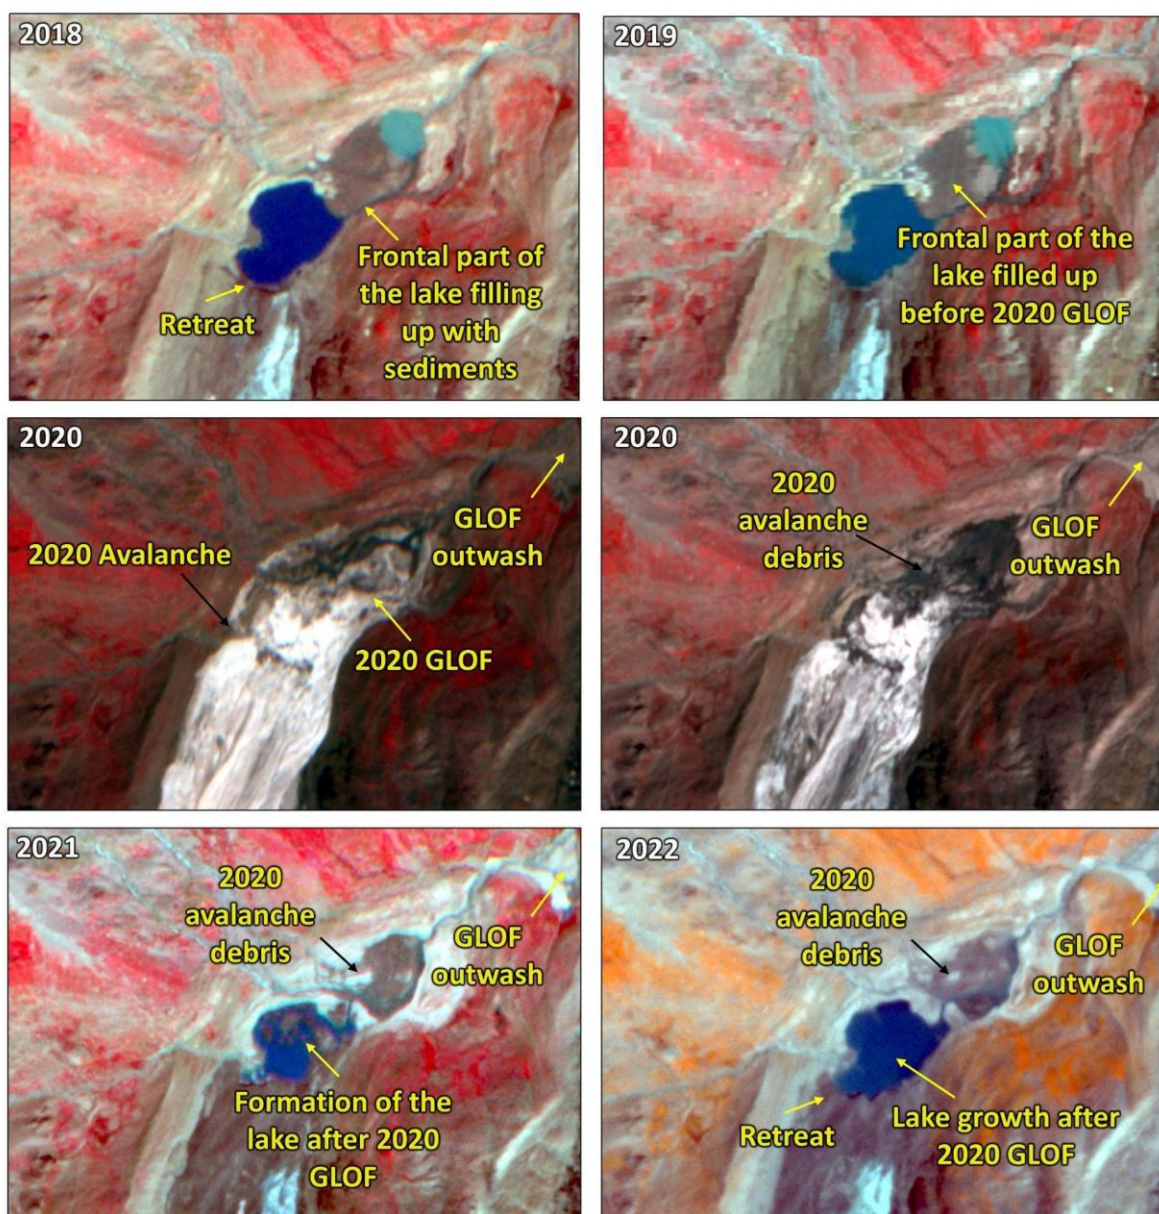

**Fig. S1.** Time-series images from 2019 to 2024 showing the avalanche-triggered GLOF event and post-GLOF changes in GL-A glacial lake. (Background images: ©PlanetScope).

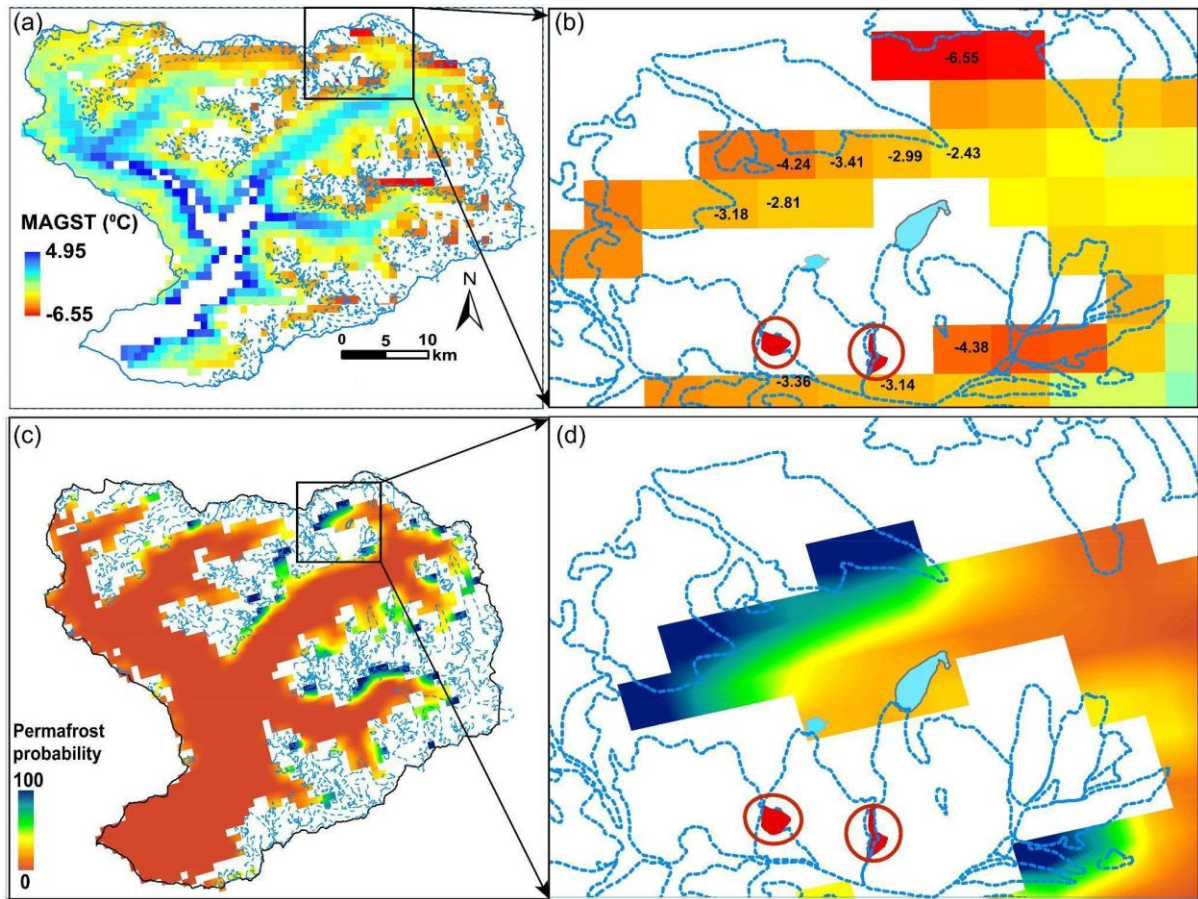

**Fig. S2.** Permafrost occurrence in the catchment and around the glacier complex (Ran et al., 2022). The red circle shows the failure zone of September 2005 and 2020 on GL-B and GL-A, respectively.
